# Supplementary material for: Identification of the surface species responsible for N2O formation from the chemisorption of NO on Rh/alumina
Source: Royal Society of Chemistry journal article supplement (doi:10.1039/b613251k), 2006-11-21
Supplement: b613251k.pdf [file b613251k.pdf]

Electronic supplementary information.

*Braiding the dynamic threads of structure, function, and reactivity in gas-solid interactions in a single experiment: how Rhodium nanoparticles, of an average 11Å diameter, select for N<sub>2</sub> or N<sub>2</sub>O when faced with NO.*

Mark A. Newton, Andrew J. Dent, Steven G. Fiddy, Bhrat Jyoti, and John Evans.

**Supplementary Table 1:** Structural and statistical parameters derived from analysis of the EDE shown in the main paper in EXCURV.

| T (K)                          | Acquisition time (msecs) | k <sub>min</sub> (Å <sup>-1</sup> ) | k <sub>max</sub> (Å <sup>-1</sup> ) | Scatterer | CN   | r(Å) | DW(2σ <sup>2</sup> )/Å <sup>2</sup> | E <sub>r</sub> (eV) | R(%) |      |       |
|--------------------------------|--------------------------|-------------------------------------|-------------------------------------|-----------|------|------|-------------------------------------|---------------------|------|------|-------|
| Prior to NO exposure, under He |                          |                                     |                                     |           |      |      |                                     |                     |      |      |       |
| 373                            | 62                       | 3                                   | 15,00                               | Rh        | 6.7  | 2.68 | 0.012                               | -3,5                | 43   |      |       |
|                                |                          |                                     |                                     | Rh        |      | 3.70 |                                     |                     |      |      |       |
|                                |                          |                                     |                                     | Rh        |      | 4.67 |                                     |                     |      |      |       |
|                                |                          |                                     |                                     | Rh        |      | 5.26 |                                     |                     |      |      |       |
| 473                            | 62                       | 2                                   | 13,00                               | Rh        | 6,35 | 2,66 | 0,014                               | 0,5                 | 45   |      |       |
| 573                            | 62                       | 2                                   | 12,00                               | Rh        | 5,1  | 2,63 | 0,016                               | 0,6                 | 45   |      |       |
| 647                            | 47                       | 3                                   | 11,00                               | Rh        | 4,2  | 2,65 | 0,024                               | 2,9                 | 80   |      |       |
| After 5%NO/He for 50 secs      |                          |                                     |                                     |           |      |      |                                     |                     |      |      |       |
| 373                            | 62                       | 3                                   | 14,00                               | Rh        | 3.8  | 2.70 | 0.009                               | -3,4                | 50   |      |       |
|                                |                          |                                     |                                     | Rh        |      | 3.74 |                                     |                     |      |      |       |
|                                |                          |                                     |                                     | Rh        |      | 4.70 |                                     |                     |      |      |       |
|                                |                          |                                     |                                     | Rh        |      | 5.29 |                                     |                     |      |      |       |
| 473                            | 62                       | 3                                   | 13,00                               | Rh        | 3,7  | 2,68 | 0,013                               | -3,7                | 52   |      |       |
|                                |                          |                                     |                                     | O         |      | 1    |                                     |                     |      | 2,03 | 0,012 |
|                                |                          |                                     |                                     | N         |      | 0,6  |                                     |                     |      | 1,77 | 0,007 |
| 573                            | 62                       | 3                                   | 12,00                               | Rh        | 1,7  | 2,65 | 0,015                               | 1,9                 | 52   |      |       |
|                                |                          |                                     |                                     | O         |      | 1,9  |                                     |                     |      | 2,06 | 0,01  |
|                                |                          |                                     |                                     | N         |      | 0,8  |                                     |                     |      | 1,88 | 0,009 |
| 647                            | 47                       | 3                                   | 10,25                               | Rh        | 1,6  | 2,65 | 0,022                               | 1,6                 | 70   |      |       |
|                                |                          |                                     |                                     | O         |      | 2,4  |                                     |                     |      | 2,04 | 0,014 |
|                                |                          |                                     |                                     | N         |      | 0,5  |                                     |                     |      | 1,79 | 0,012 |

Errors in CN should be considered in the range ± 10-20%, those of bondlengths ( r ) ± 1.5-2%  
 $R(\%) = \left( \int [\chi^T - \chi^E] k^3 dk / [\chi^E] k^3 dk \right) \times 100\%$ :  $\chi^T$  being the theoretically calculated EXAFS and  $\chi^E$  being the EXAFS obtained via experiment.

$\sigma$  = the root mean square displacement in internuclear separation.

In the simplest approximation (ref 29, main paper) Rh-Rh first shell co-ordinations of ca. 7 and 4 would indicate Rh nanoparticles of average ca. 40 and 15 atoms respectively.

Similarly bulk Rh<sub>2</sub>O<sub>3</sub> would be expected to yield Rh-Rh CN of 2 at ca. 2.71Å and 3O at ca 2-2.1Å.
